# Supplementary material
Source: PubMed Central journal article supplement (PMC2796931)

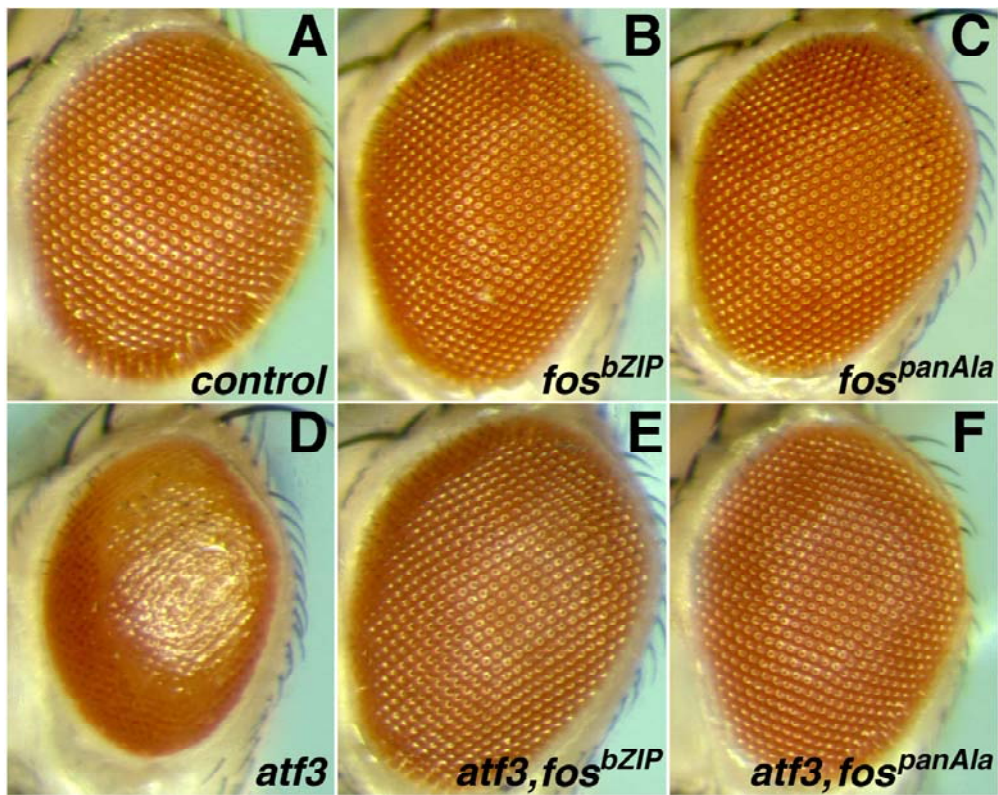

Supplement: supp_137.1.141_037861-FigS1.pdf [file supp_137.1.141_037861-FigS1.pdf]

**DAPI, Dlg**

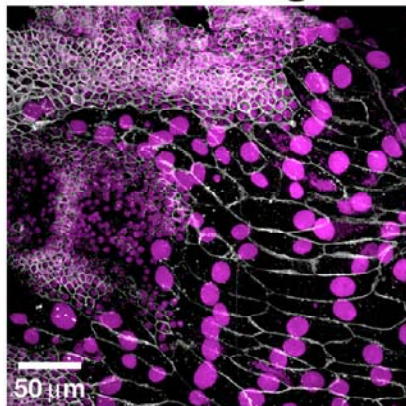

**Jun**

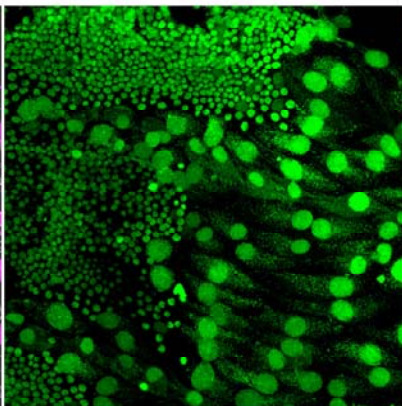

**DAPI+Jun merge**

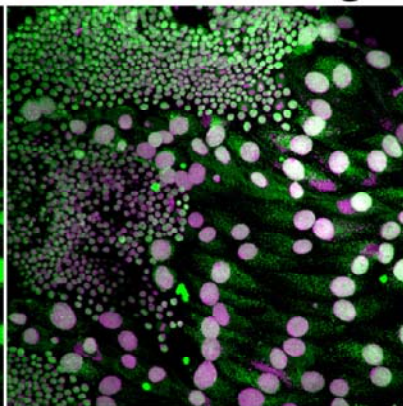

Supplement: supp_137.1.141_037861-FigS10.pdf [file supp_137.1.141_037861-FigS10.pdf]

**A** *ppl>atf3*      *ppl>p35*      *ppl>DIAP1*

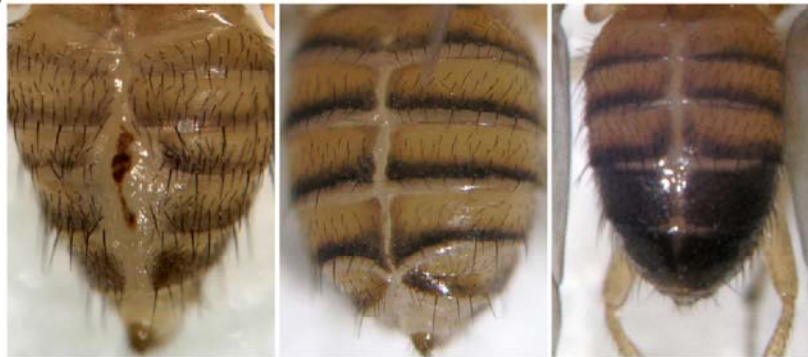

**B** *ppl>p35*

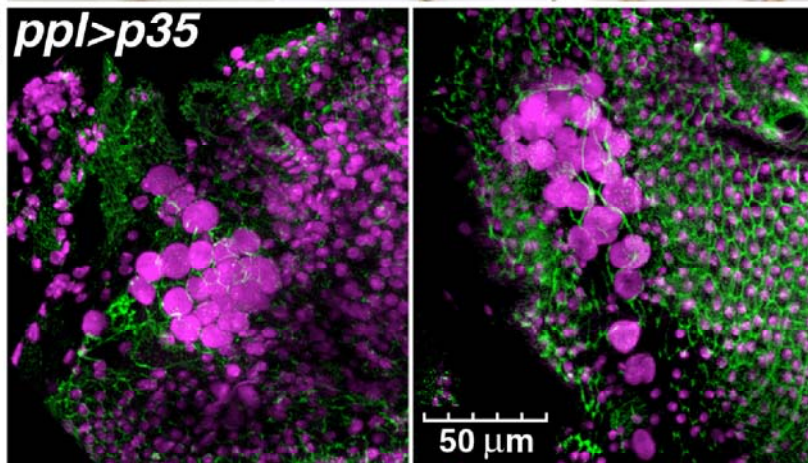

Supplement: supp_137.1.141_037861-FigS11.pdf [file supp_137.1.141_037861-FigS11.pdf]

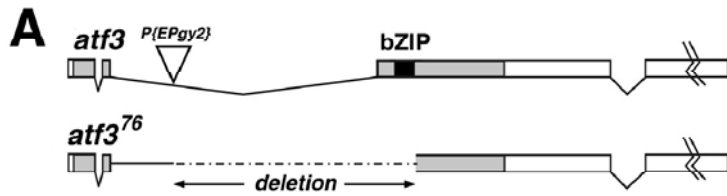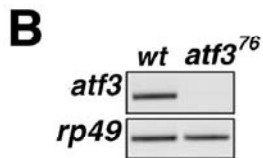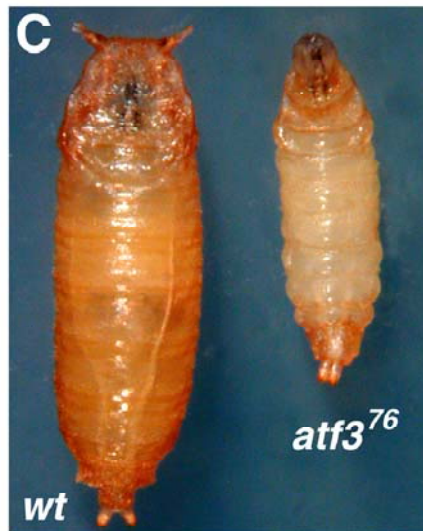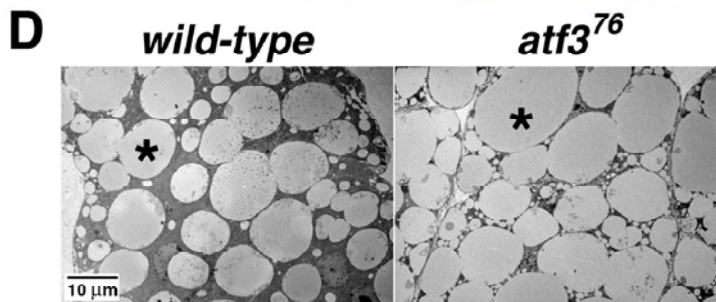

Supplement: supp_137.1.141_037861-FigS2.pdf [file supp_137.1.141_037861-FigS2.pdf]

*control*

*hsFlp>atf3*

*hsFlp>atf3*

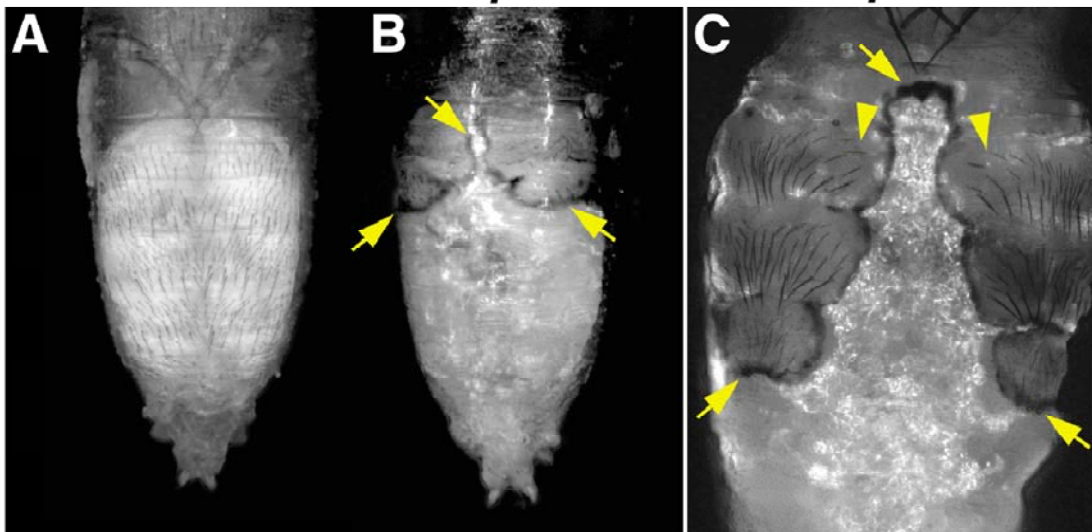

Supplement: supp_137.1.141_037861-FigS4.pdf [file supp_137.1.141_037861-FigS4.pdf]

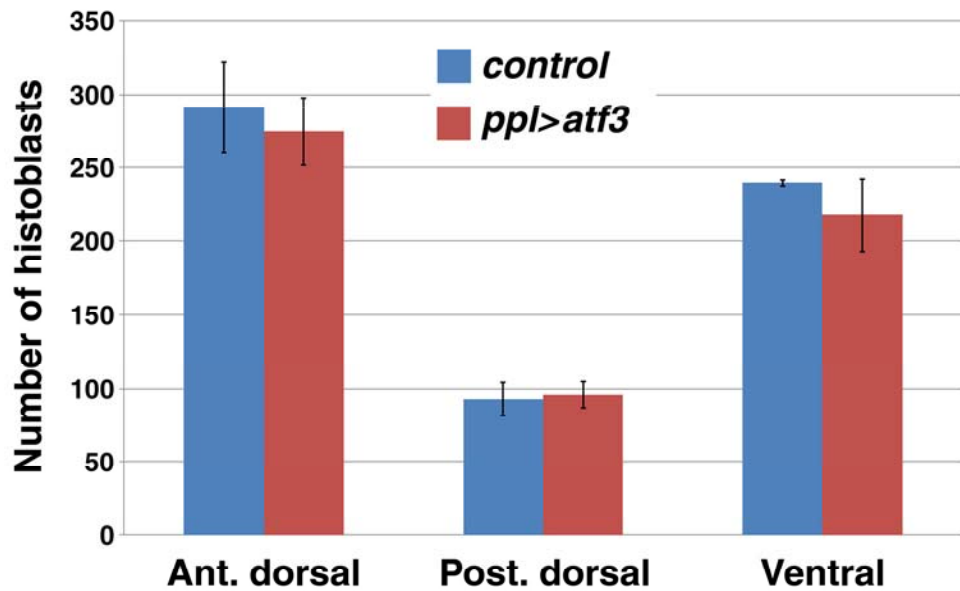

Supplement: supp_137.1.141_037861-FigS5.pdf [file supp_137.1.141_037861-FigS5.pdf]

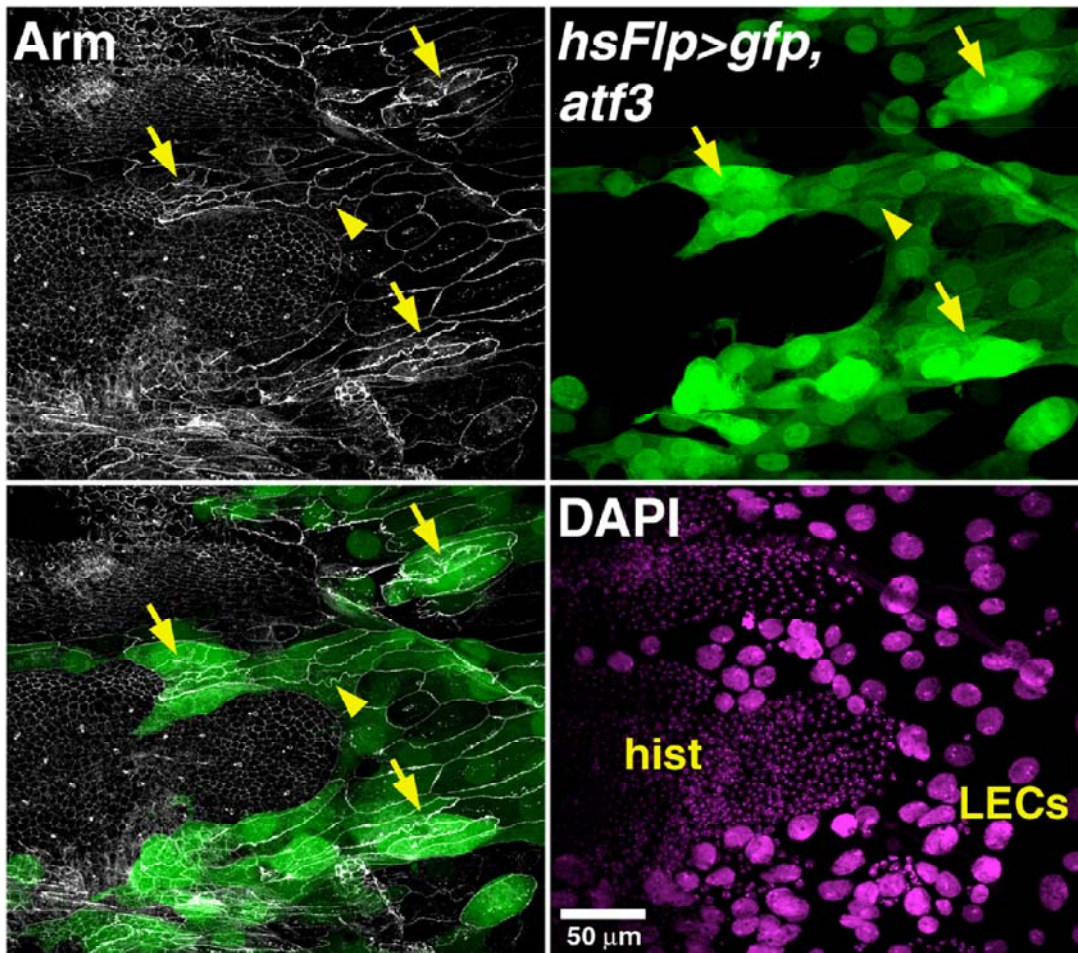

Supplement: supp_137.1.141_037861-FigS6.pdf [file supp_137.1.141_037861-FigS6.pdf]

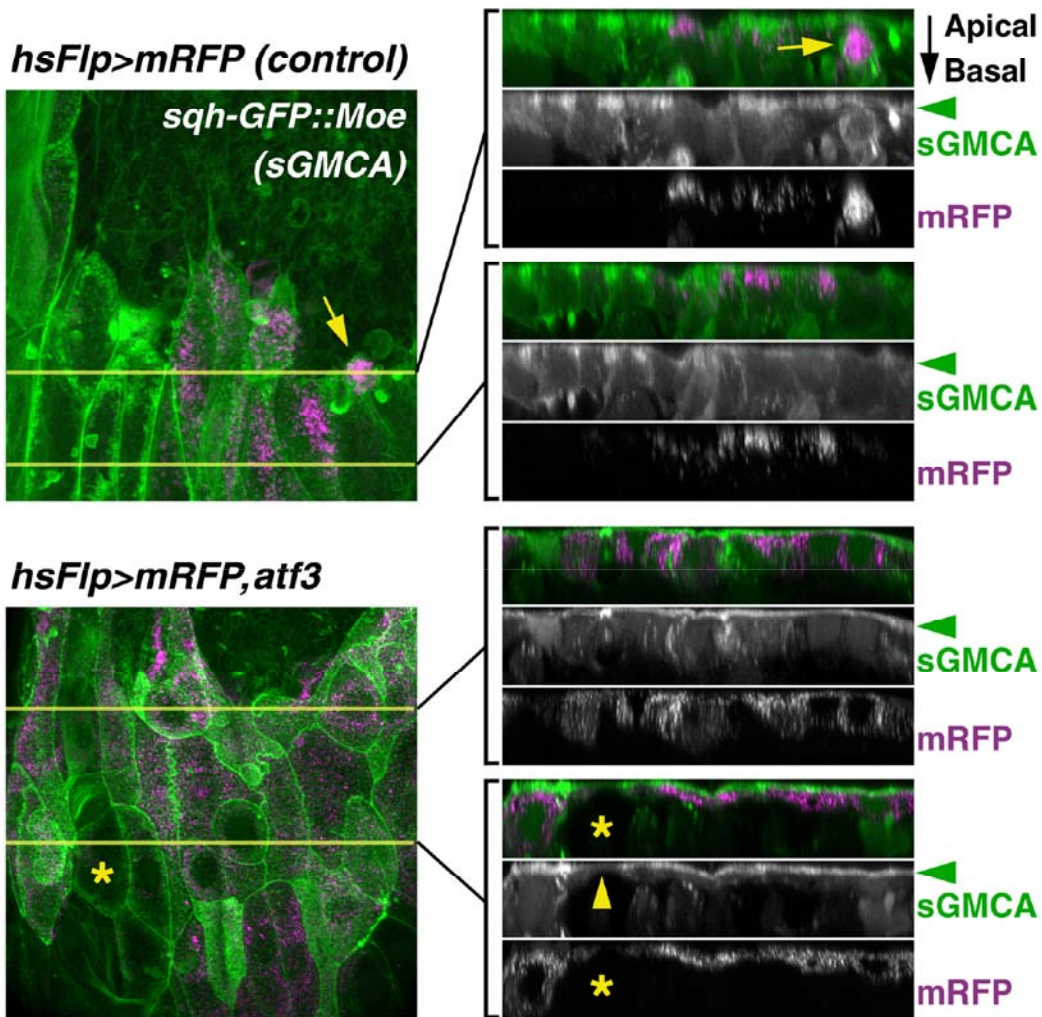

Supplement: supp_137.1.141_037861-FigS8.pdf [file supp_137.1.141_037861-FigS8.pdf]

DE-cad::GFP

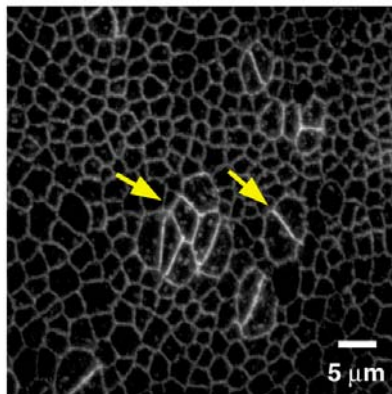

DE-cad::GFP, mRFP

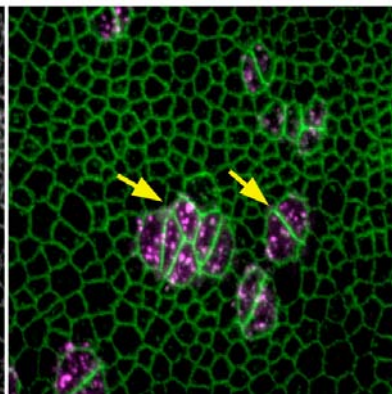

DE-cad::GFP (3D)

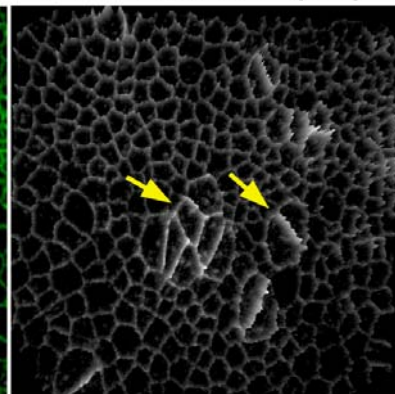

Supplement: supp_137.1.141_037861-FigS9.pdf [file supp_137.1.141_037861-FigS9.pdf]
